# Supplementary material
Source: PubMed Central journal article supplement (PMC6397380)
Supplement: suppl-material.pdf [file suppl-material.pdf]

**Figure S1.**

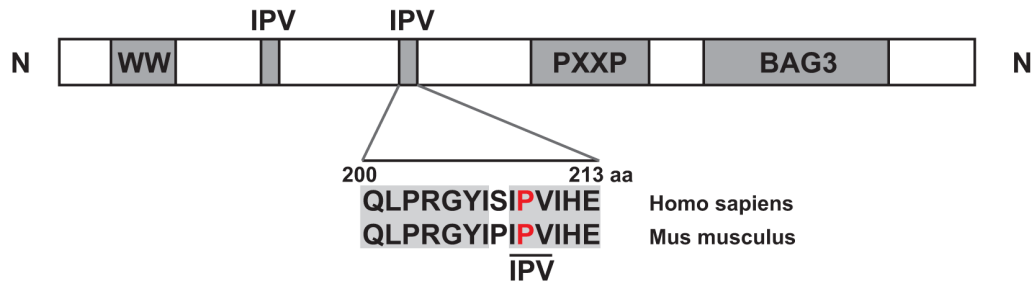

**Figure S1. Amino acid sequence at second IPV motif alignment between human and mouse BAG3.** Identical amino acids between human and mouse BAG3 are highlight in gray colors. Positions of the IPV triads are underlined. The mutated Proline residues are marked in red colors. aa, amino acid residues.

**Table S1.** Genotypes of embryos from *Bag3<sup>m/+</sup> / Bag3<sup>m/+</sup>* intercrosses.

| Genotype                  | Observed     | Expected     |
|---------------------------|--------------|--------------|
| Wildtype (+/+)            | 27.7% (n=30) | 25% (n=27)   |
| <i>Bag3<sup>m/+</sup></i> | 47.2% (n=51) | 50% (n=54)   |
| <i>Bag3<sup>m/m</sup></i> | 23.1% (n=27) | 25% (n=27)   |
| Total                     | 100% (n=108) | 100% (n=108) |

**Table S2.** Primer sequences used for quantitative RT-PCR analysis.

| Gene           | Forward Primer (5'-3')    | Reverse Primer (5'-3')     |
|----------------|---------------------------|----------------------------|
| <i>Anf</i>     | GATAGATGAAGGCAGGAAGCCGC   | AGGATTGGAGCCCAGAGTGGACTAGG |
| <i>Bnp</i>     | TGTTTCTGCTTTTCCTTTATCTGTC | CTCCGACTTTTCTCTTATCAGCTC   |
| <i>Coll1a1</i> | TCACCAAACCTCAGAAGATGTAGGA | GACCAGGAGGACCAGGAAG        |
| <i>Coll3a1</i> | ACAGCAGTCCAACGTAGATGAAT   | TCACAGATTATGTCATCGCAAAG    |
| <i>18s</i>     | GGAAGGGCACCACCAGGAGT      | TGCAGCCCCGGACATCTAAG       |

**Table S3.** Antibodies used for western blot analysis.

| Antibody                   | Source             | Cat. No.     |
|----------------------------|--------------------|--------------|
| <b>BAG3</b>                | Proteintech        | 10599-1-AP   |
| <b>HSP22/HSPB8</b>         | Abcam              | ab151552     |
| <b>αB-crystallin/HSPB5</b> | Enzo Life Sciences | ADISPA-223   |
| <b>HSP20/HSPB6</b>         | R&D                | MAB4200      |
| <b>HSP70/HSP72</b>         | Enzo Life Sciences | ADISPA-810-D |
| <b>HSP90</b>               | Abcam              | ab178854     |
| <b>HSC70/HSP73</b>         | Enzo Life Sciences | ADISPA-815-F |
| <b>LC3B</b>                | Cell Signaling     | 2775S        |

|                   |                   |          |
|-------------------|-------------------|----------|
| <b>Ub</b>         | Santa Cruz        | sc-8017  |
| <b>SQSTM1/p62</b> | Progen Biotechnik | GP62-C   |
| <b>GAPDH</b>      | Santa Cruz        | sc-32233 |
